# Supplementary material for: Nanoparticles and photochemistry for native-like transmembrane protein footprinting
Source: PubMed Central journal article supplement (PMC8671412; doi:10.1038/s41467-021-27588-8), 2021-12-14
Supplement: 41467_2021_27588_MOESM1_ESM.pdf [file 41467_2021_27588_MOESM1_ESM.pdf]

## **Nanoparticles and Photochemistry for Native-like Transmembrane Protein Footprinting**

Jie Sun<sup>[1]</sup>, Xiaoran Roger Liu<sup>[1]</sup>, Shuang Li<sup>[2]</sup>, Peng He<sup>[2]</sup>, Weikai Li\*<sup>[2]</sup> and Michael L. Gross\*<sup>[2]</sup>

[1] Department of Chemistry, Washington University in St. Louis, One Brookings Drive, Box 1134, Saint Louis, Missouri 63130, E-mail: mgross@wustl.edu

[2] Department of Biochemistry and Molecular Biophysics, Washington University School of Medicine, 660 S. Euclid Ave, Box 8231, St. Louis, MO 63110 USA, Email: weikai@wustl.edu

### **Table of Contents**

#### **1. Supplementary Figures**

Supplementary Figure 1. FPOP flow system

Supplementary Figure 2. Workflow for filter-aided sample preparation (FASP)

Supplementary Figure 3. Mass spectrometry sequence coverage of VKOR in bottom-up proteomics

Supplementary Figure 4. UV-Vis spectrum of TiO<sub>2</sub> nanoparticle suspension

Supplementary Figure 5-14 EIC, MS and MS<sup>2</sup> of unmodified and representative modified peptides from VKOR

Supplementary Figure 15 Circular dichroism spectrum of membrane protein VKOR

Supplementary Figure 16 VKOR enzymatic activity assay

Supplementary Figure 17 Mass spectrometry sequence coverage of hGLUT1 in bottom up proteomics

Supplementary Figure 18-25 EIC, MS and MS<sup>2</sup> of unmodified and representative modified peptides from hGLUT1

Supplementary Figure 26 SASA change upon ligand binding of hGLUT1

#### **2. Supplementary Tables**

Supplementary Table 1 Optimization of different conditions for NanoPOMP

Supplementary Table 2 NanoPOMP experiments of hGLUT1 in liposome

Supplementary Table 3 TiO<sub>2</sub>-FPOP of hGLUT1

Supplementary Table 4 NanoPOMP of hGLUT1

Supplementary Table 5 Test of IPA on hGLUT1

## 1. Supplementary Figures

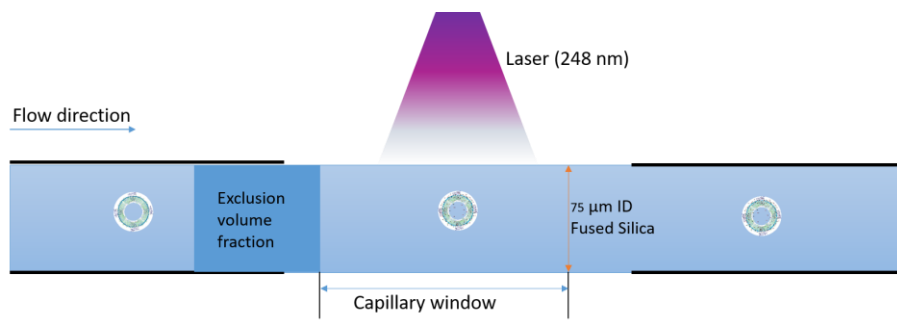

**Supplementary Figure 1.** NanoPOMP flow system.

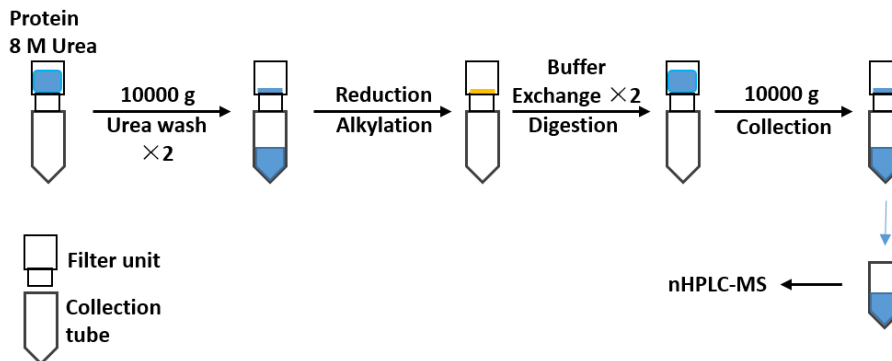

**Supplementary Figure 2.** Workflow for filter-aided sample preparation (FASP).

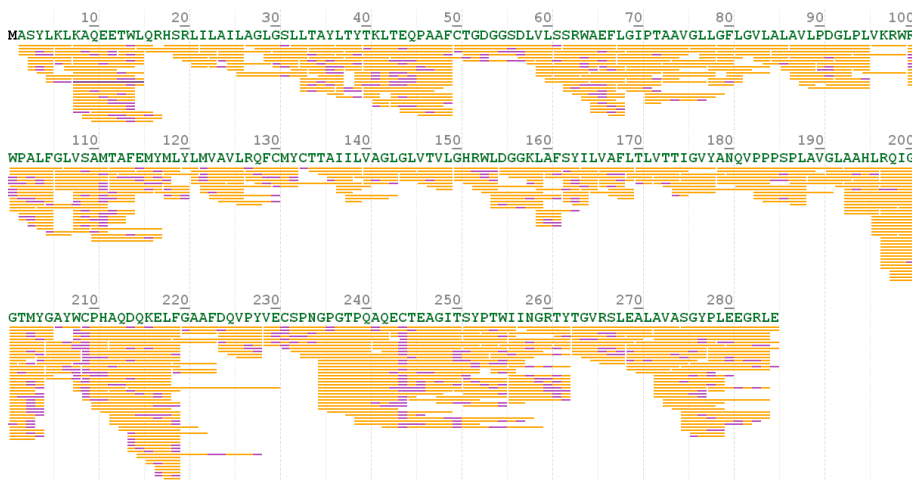

**Supplementary Figure 3.** MS sequence coverage of VKOR in bottom-up proteomics as determined by Biologic™ software (100%).

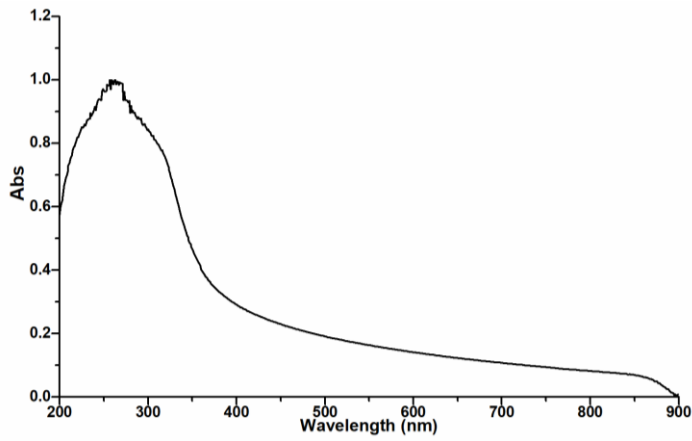

**Supplementary Figure 4.** UV-Vis absorption spectrum of TiO<sub>2</sub> NPs suspension in water. Source data are provided as a Source Data file.

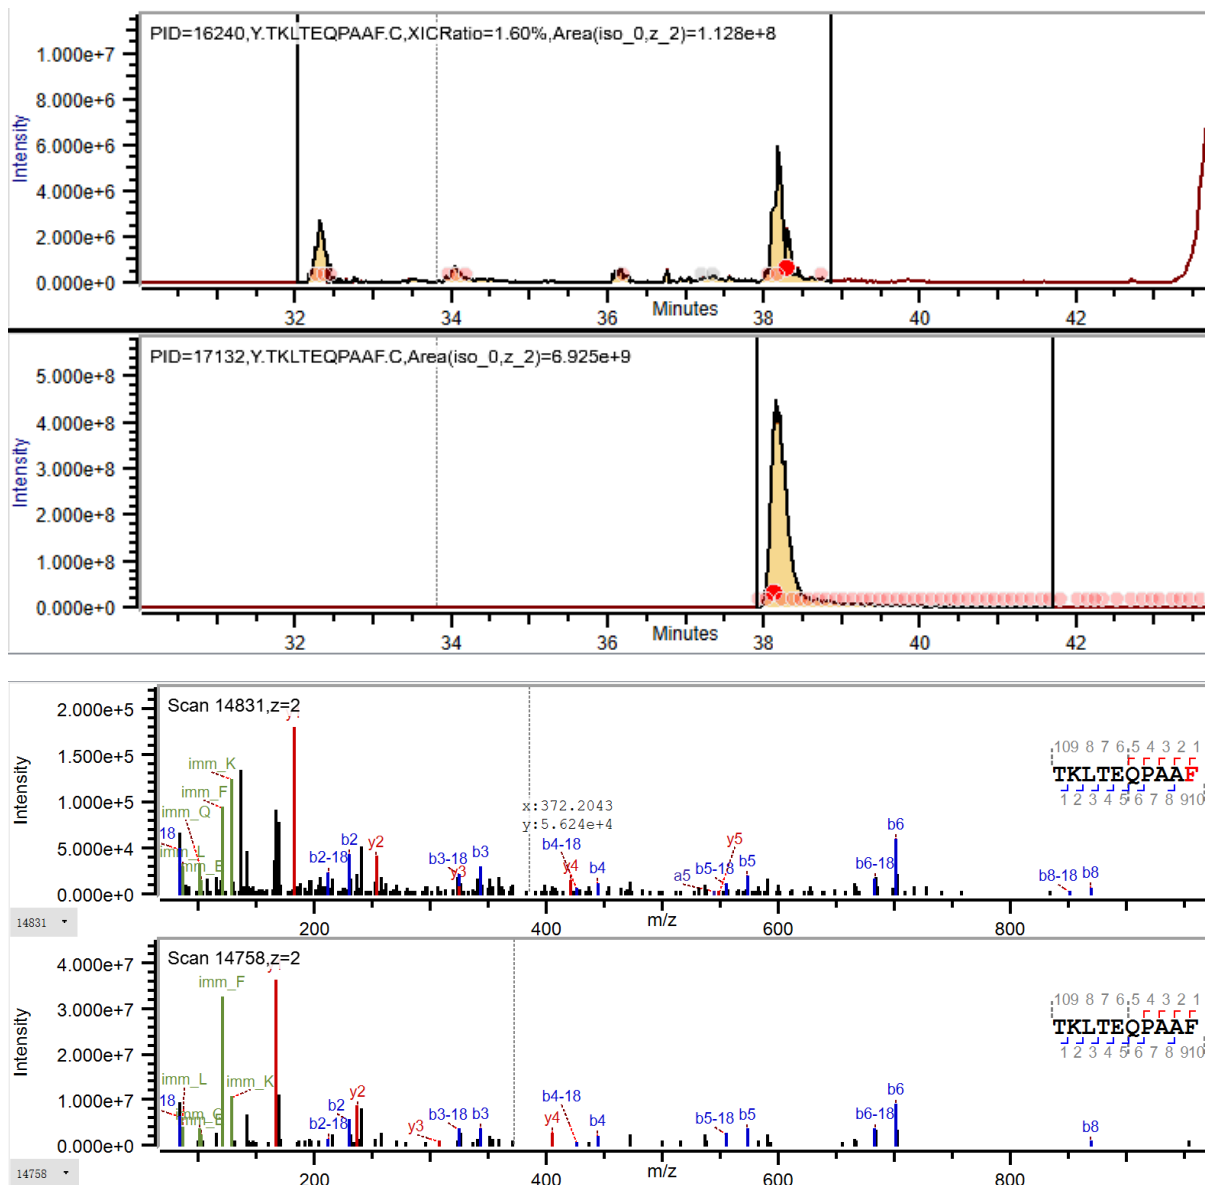

**Supplementary Figure 5.** EIC and product-ion (MS/MS) spectra of modified (top) and unmodified (bottom) peptide 40-49 from VKOR.

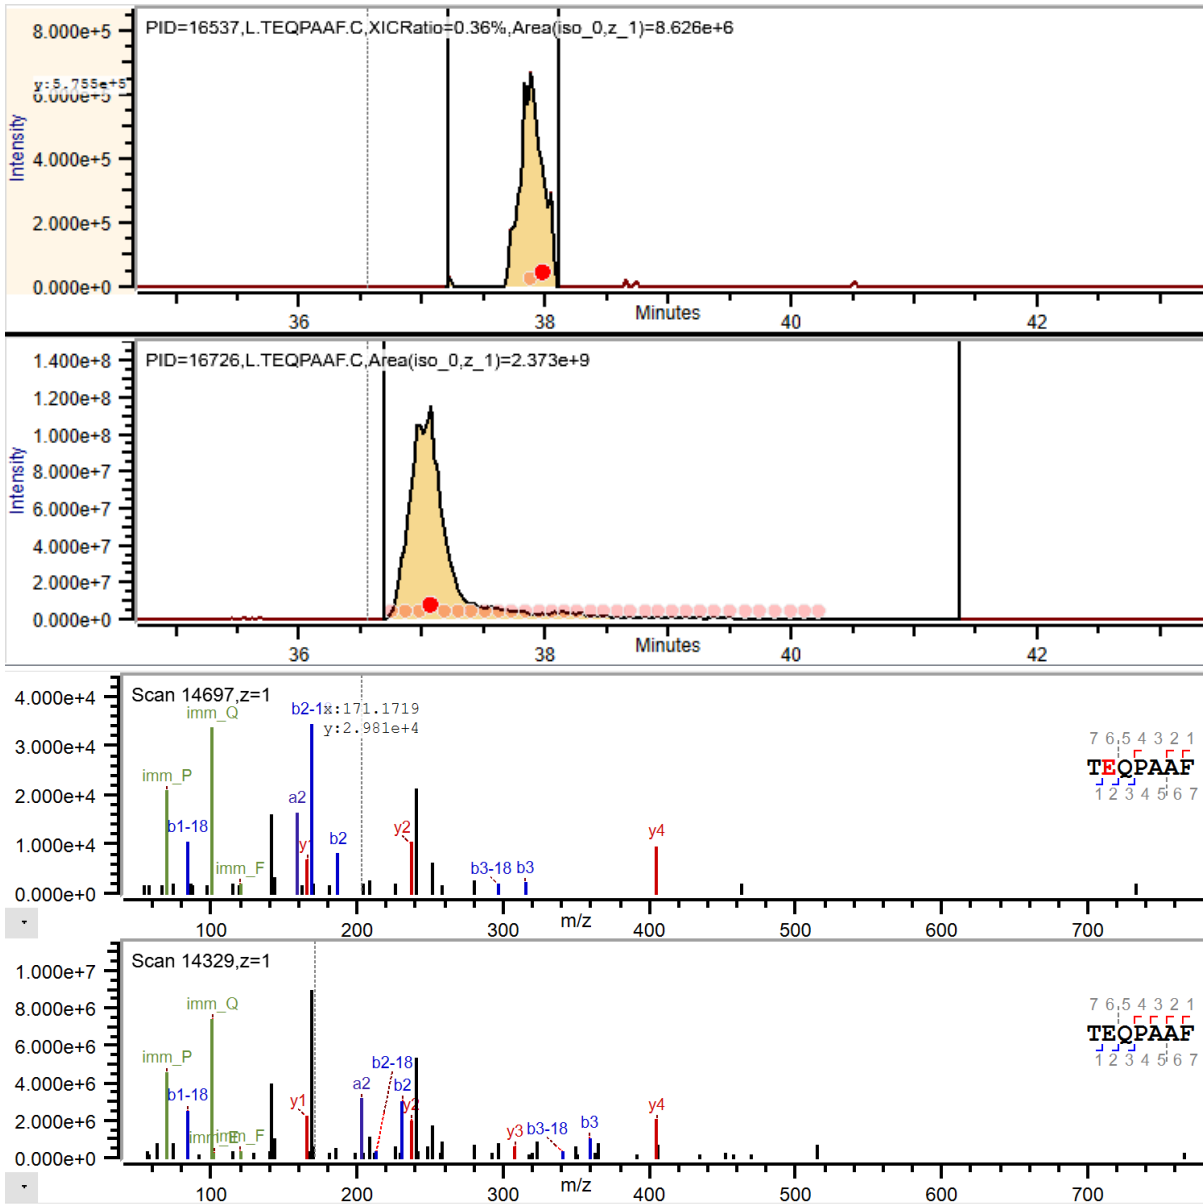

**Supplementary Figure 6.** EIC and product-ion (MS/MS) spectra of modified (top) and unmodified (bottom) peptide 43-49 from VKOR.

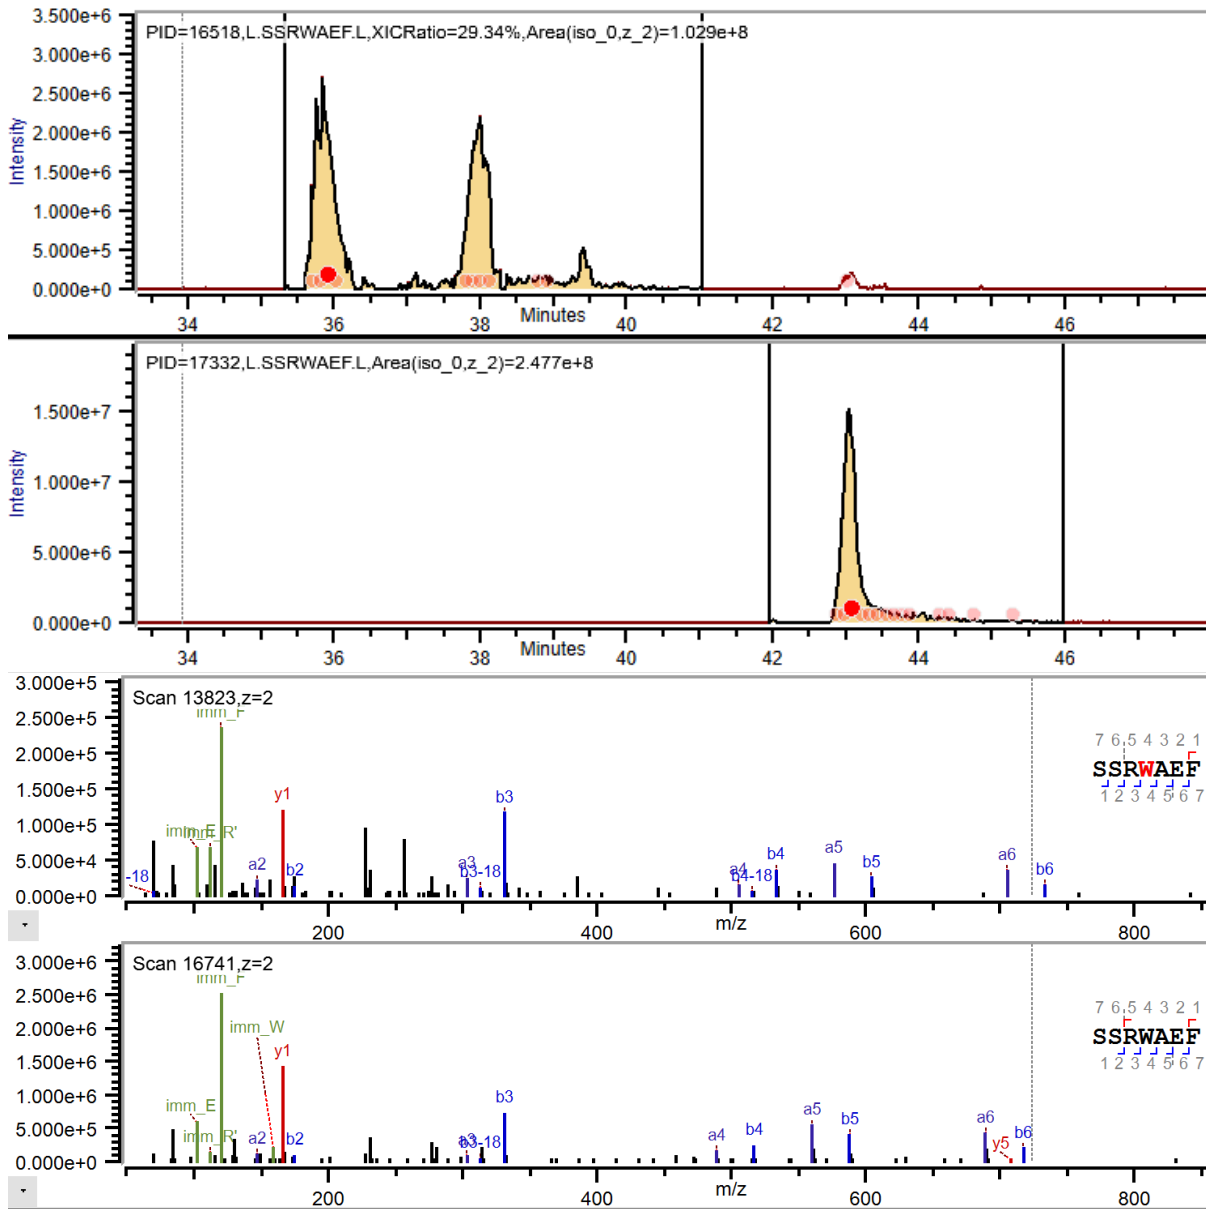

**Supplementary Figure 7.** EIC and product-ion (MS/MS) spectra of unmodified (top) and modified (bottom) peptide 61-67 from VKOR.

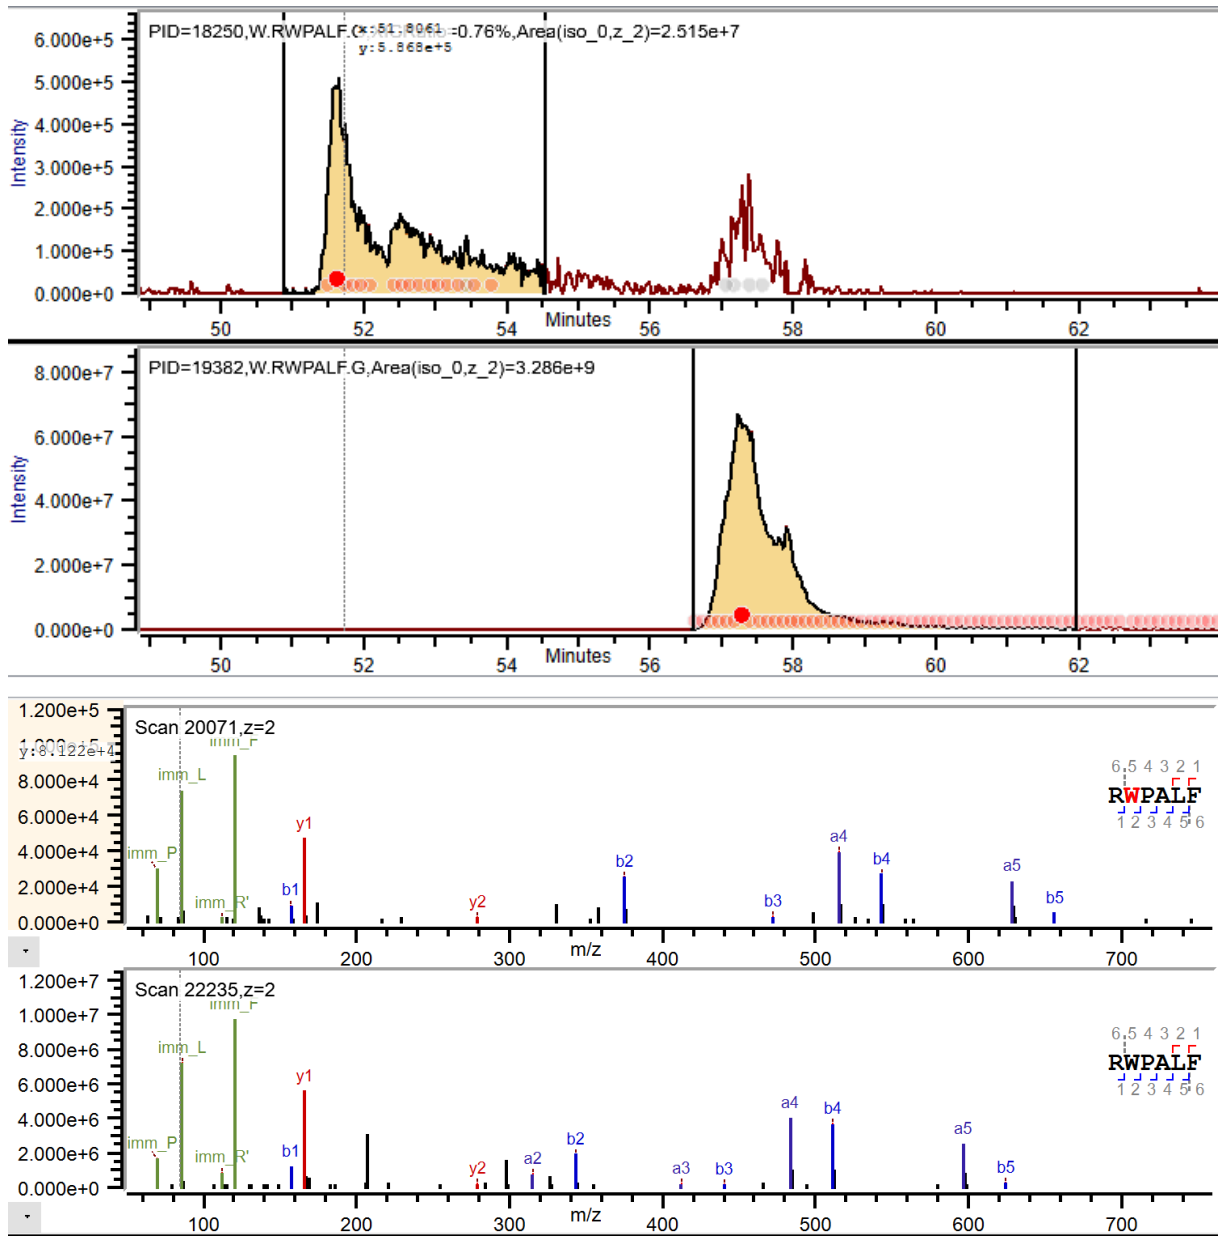

**Supplementary Figure 8.** EIC and product-ion (MS/MS) spectra of modified (top) and unmodified (bottom) peptide 100-105 from VKOR.

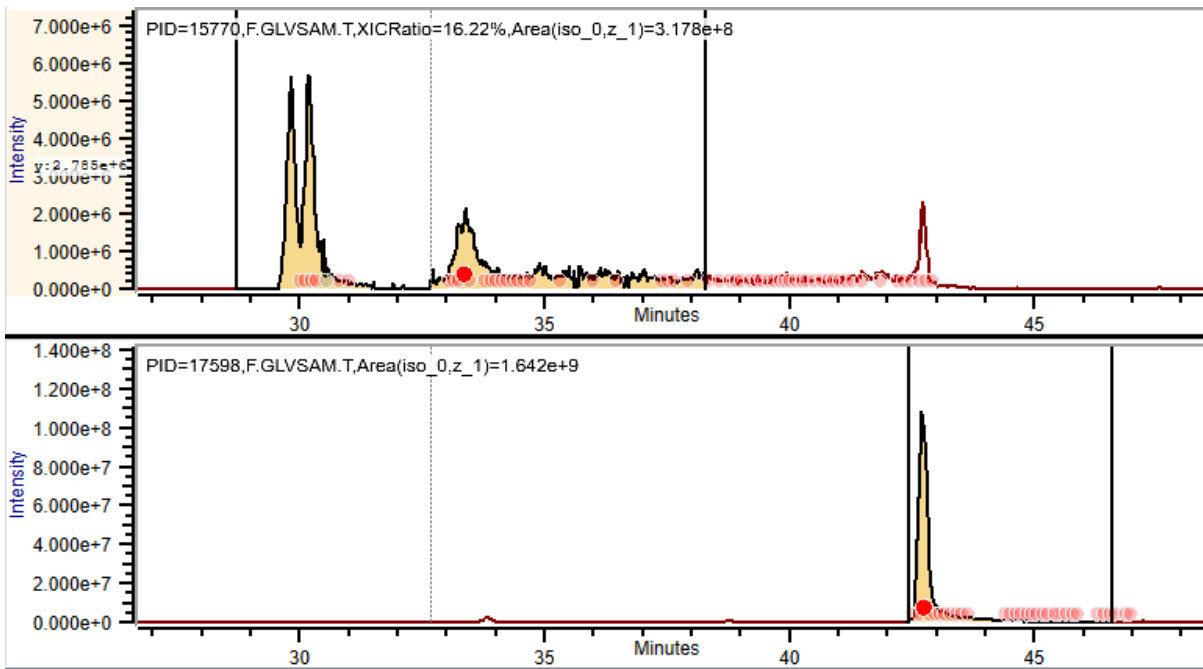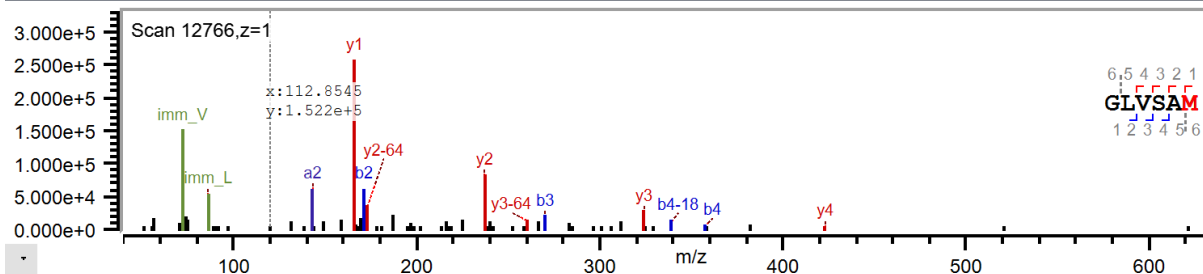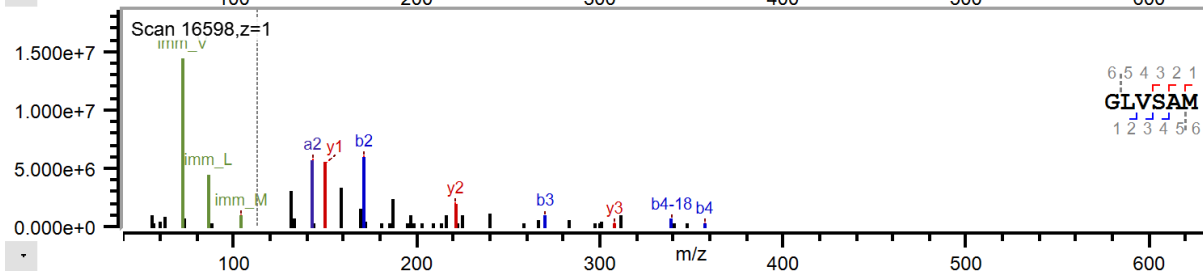

**Supplementary Figure 9.** EIC and product-ion (MS/MS) spectra of modified (top) and unmodified (bottom) peptide 106-111 from VKOR.

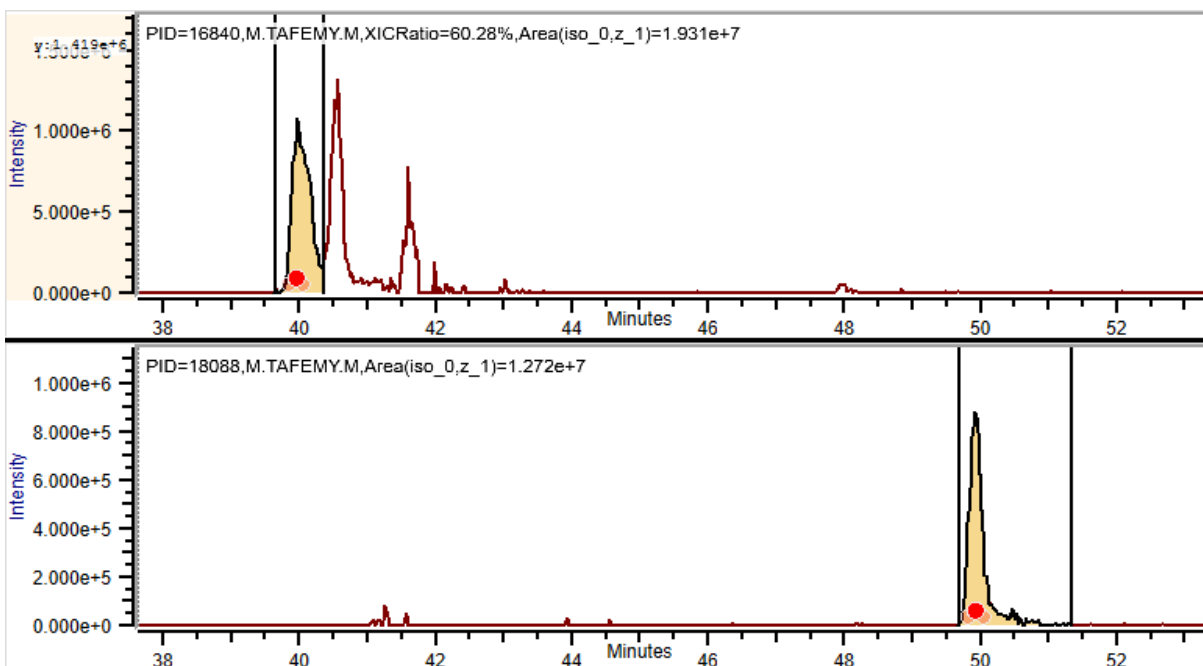

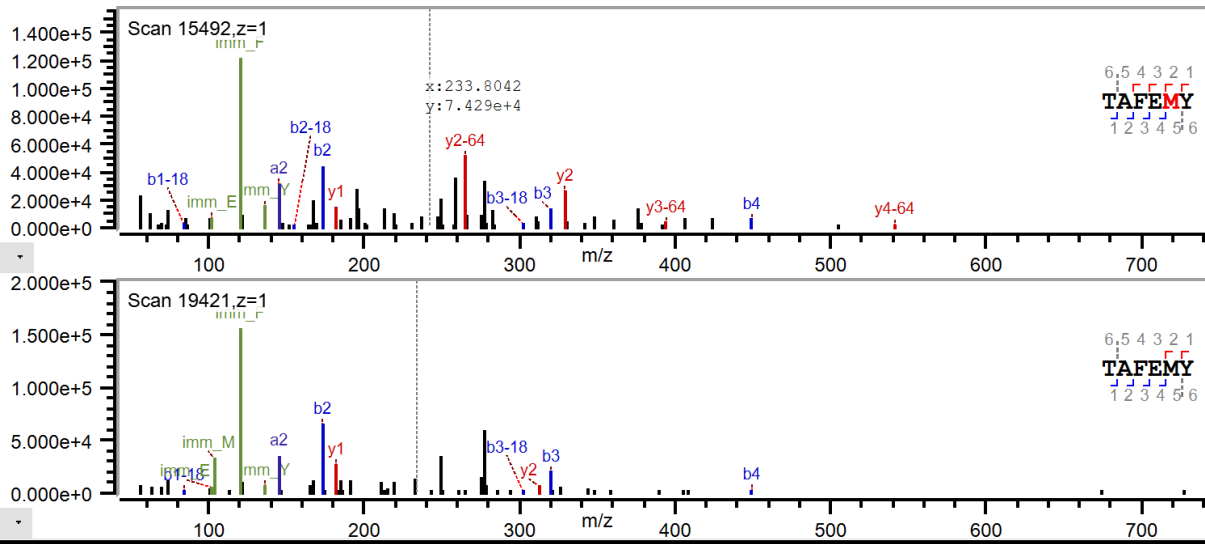

**Supplementary Figure 10.** EIC and product-ion (MS/MS) spectra of unmodified (top) and modified (bottom) peptide 112-117 from VKOR.

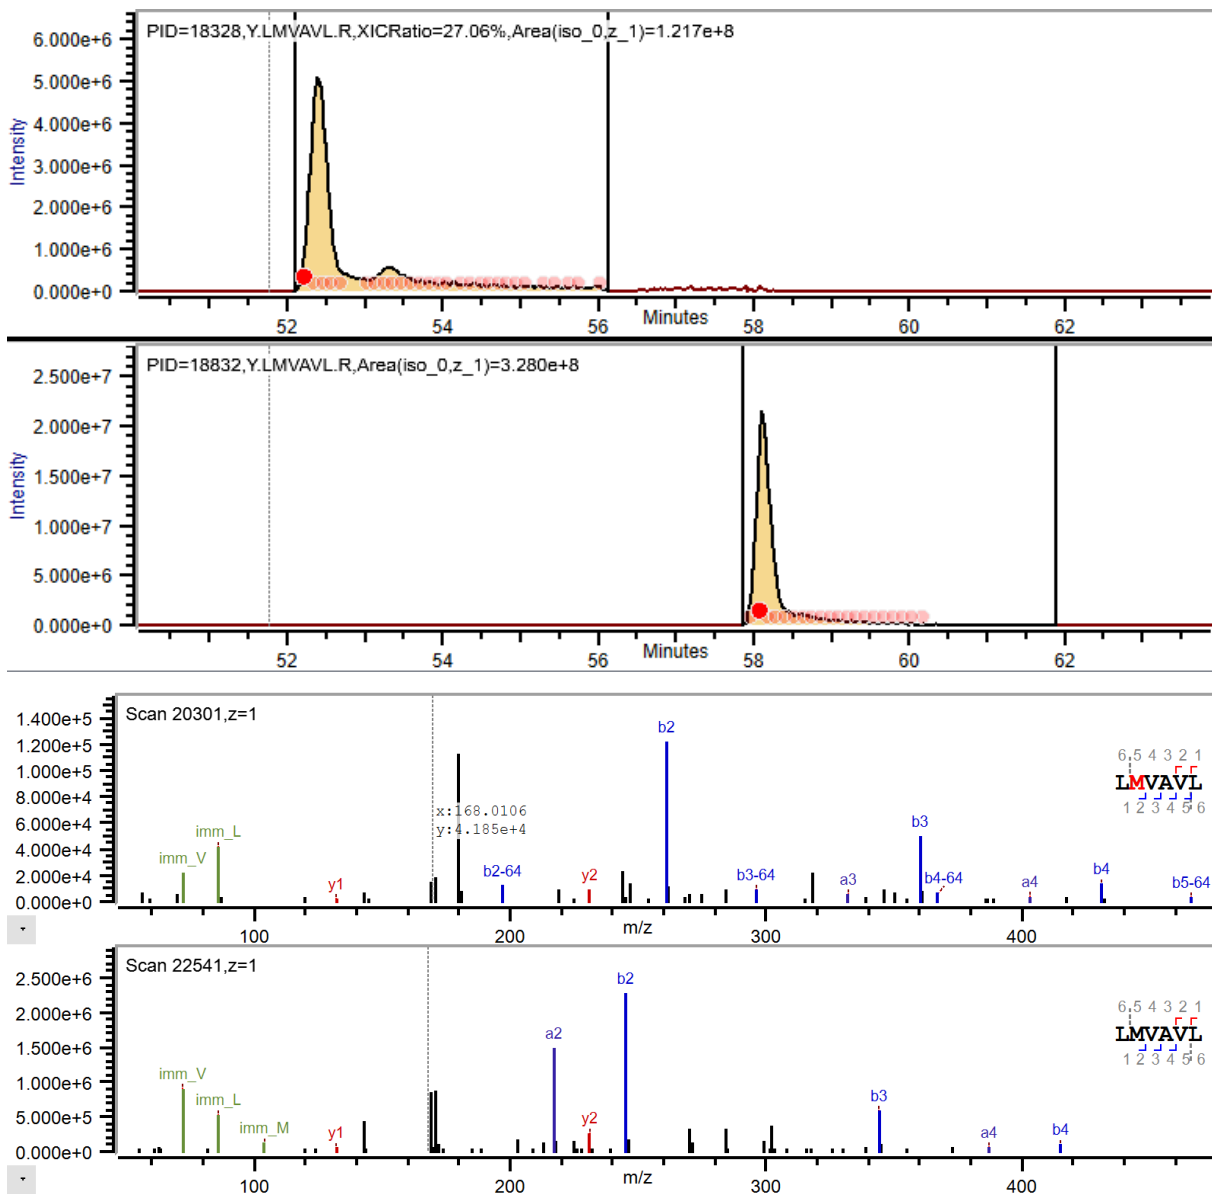

**Supplementary Figure 11.** EIC and product-ion (MS/MS) spectra of modified (top) and unmodified (bottom) peptide 121-126 from VKOR.



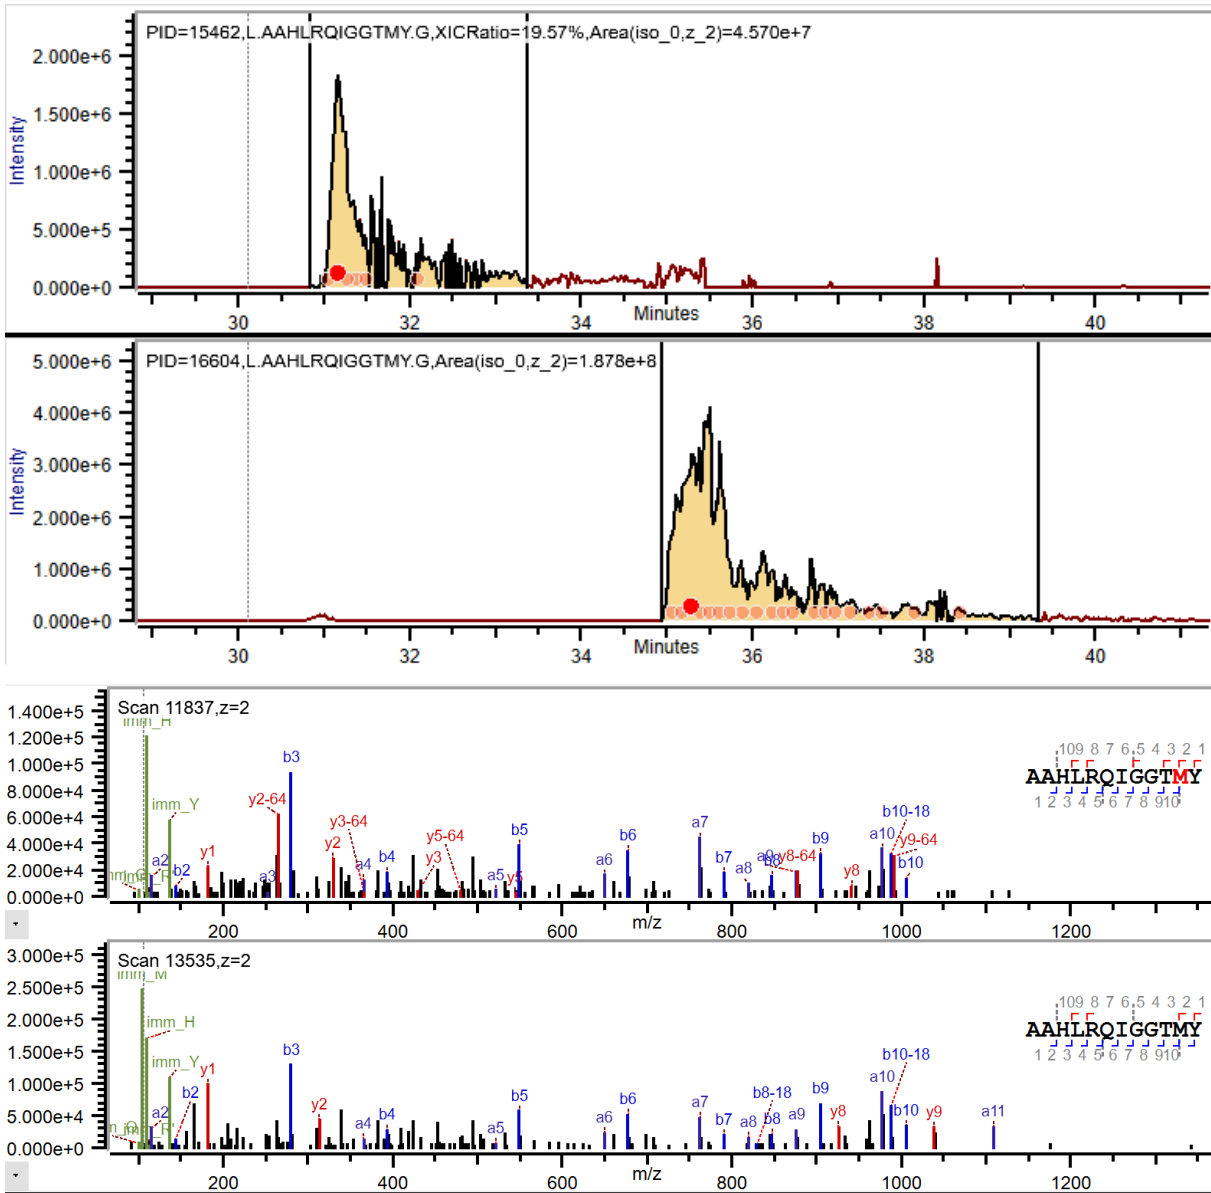

**Supplementary Figure 12.** EIC and product-ion (MS/MS) spectra of modified (top) and unmodified (bottom) peptide 193-204 from VKOR.

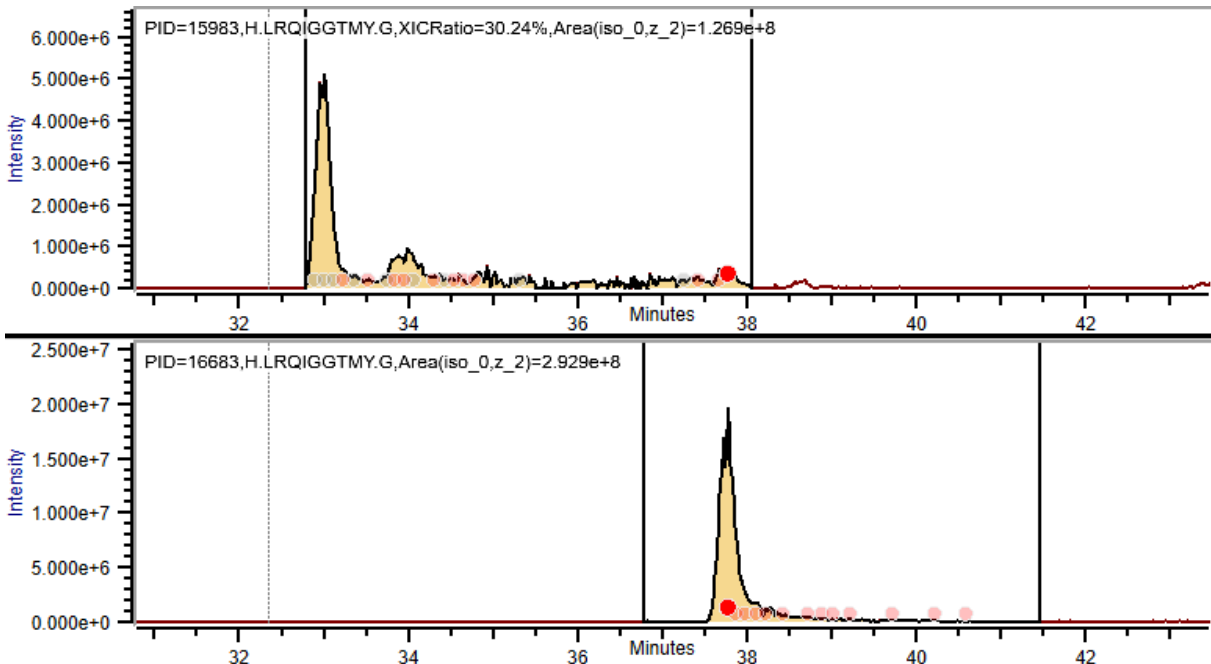

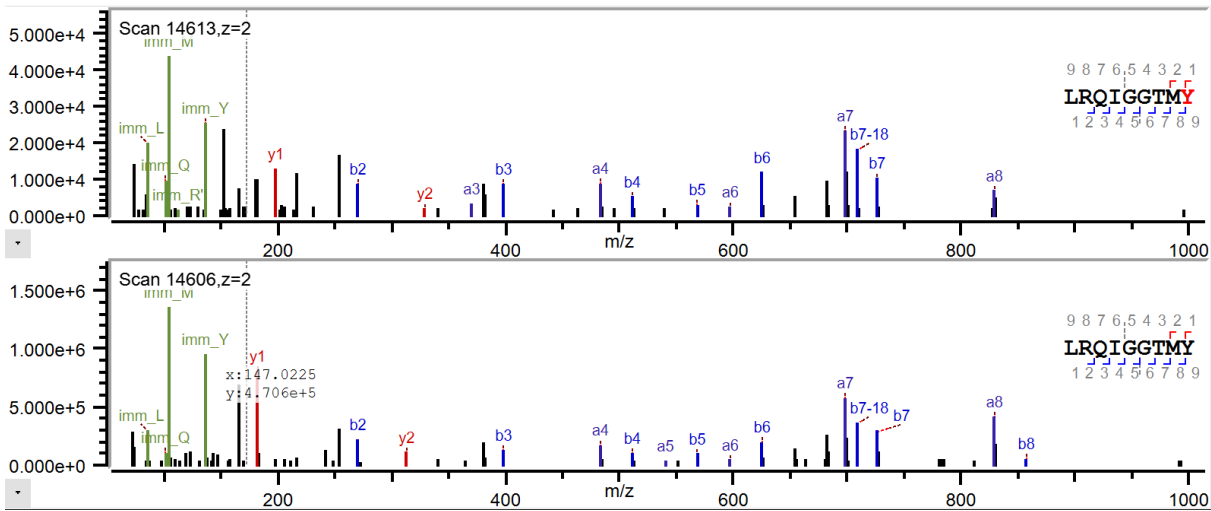

**Supplementary Figure 13.** EIC and product-ion (MS/MS) spectra of modified (top) and unmodified (bottom) peptide 196-204 from VKOR.

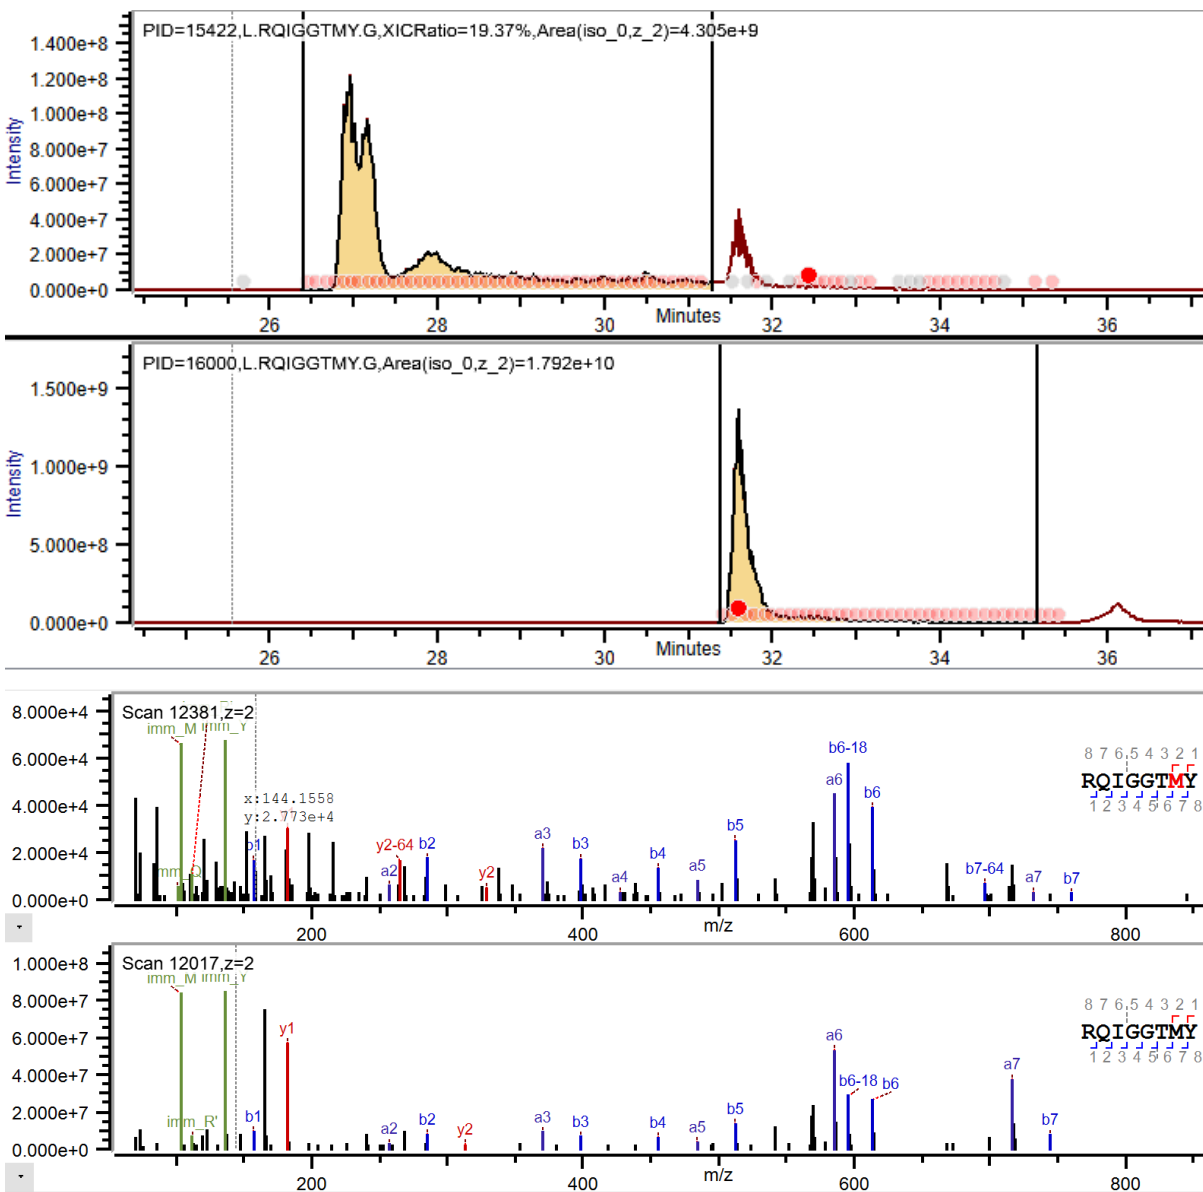

**Supplementary Figure 14.** EIC and product-ion (MS/MS) spectra of modified (top) and unmodified (bottom) peptide 197-204 from VKOR.

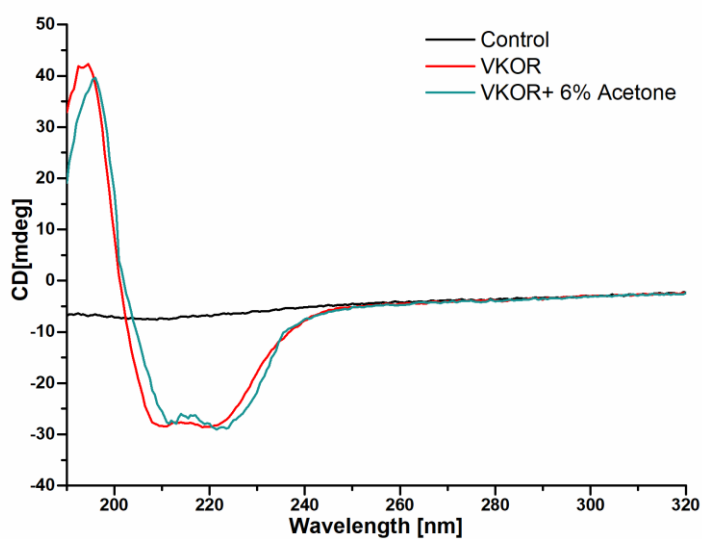

**Supplementary Figure 15.** Circular dichroism spectrum of membrane protein VKOR. Black line is for the blank. Red line represents 2  $\mu\text{M}$  VKOR in water with 5% DDM detergent. Green line represents 2  $\mu\text{M}$  VKOR in water with 5% DDM detergent and 6% acetone. Source data are provided as a Source Data file.

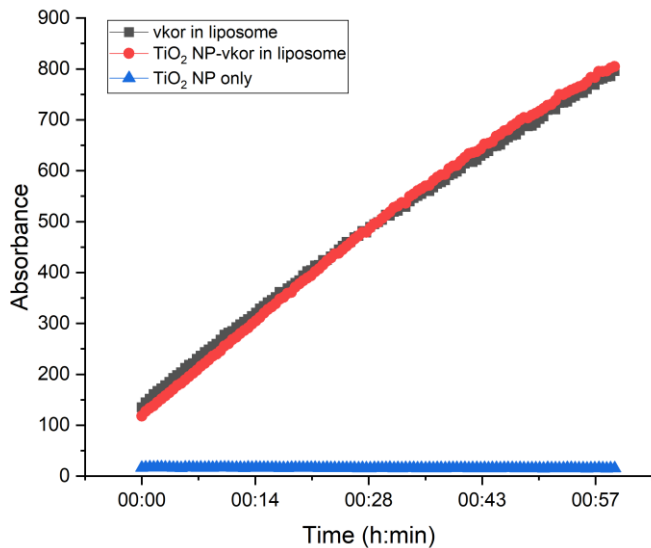

**Supplementary Figure 16.** VKOR enzymatic activity assay. Y axis represents fluorescence intensity of KH2 with VKOR (5  $\mu\text{M}$ ) and  $\text{TiO}_2$  NPs. The slope of the curve represents the enzymatic activity of VKOR protein.

sp|P11166|GTR1\_HUMAN Solute carrier family 2, facilitated glucose transporter member 1 OS=Homo sapiens OX=9606 GN=SLC2A1 PE=1 SV=1

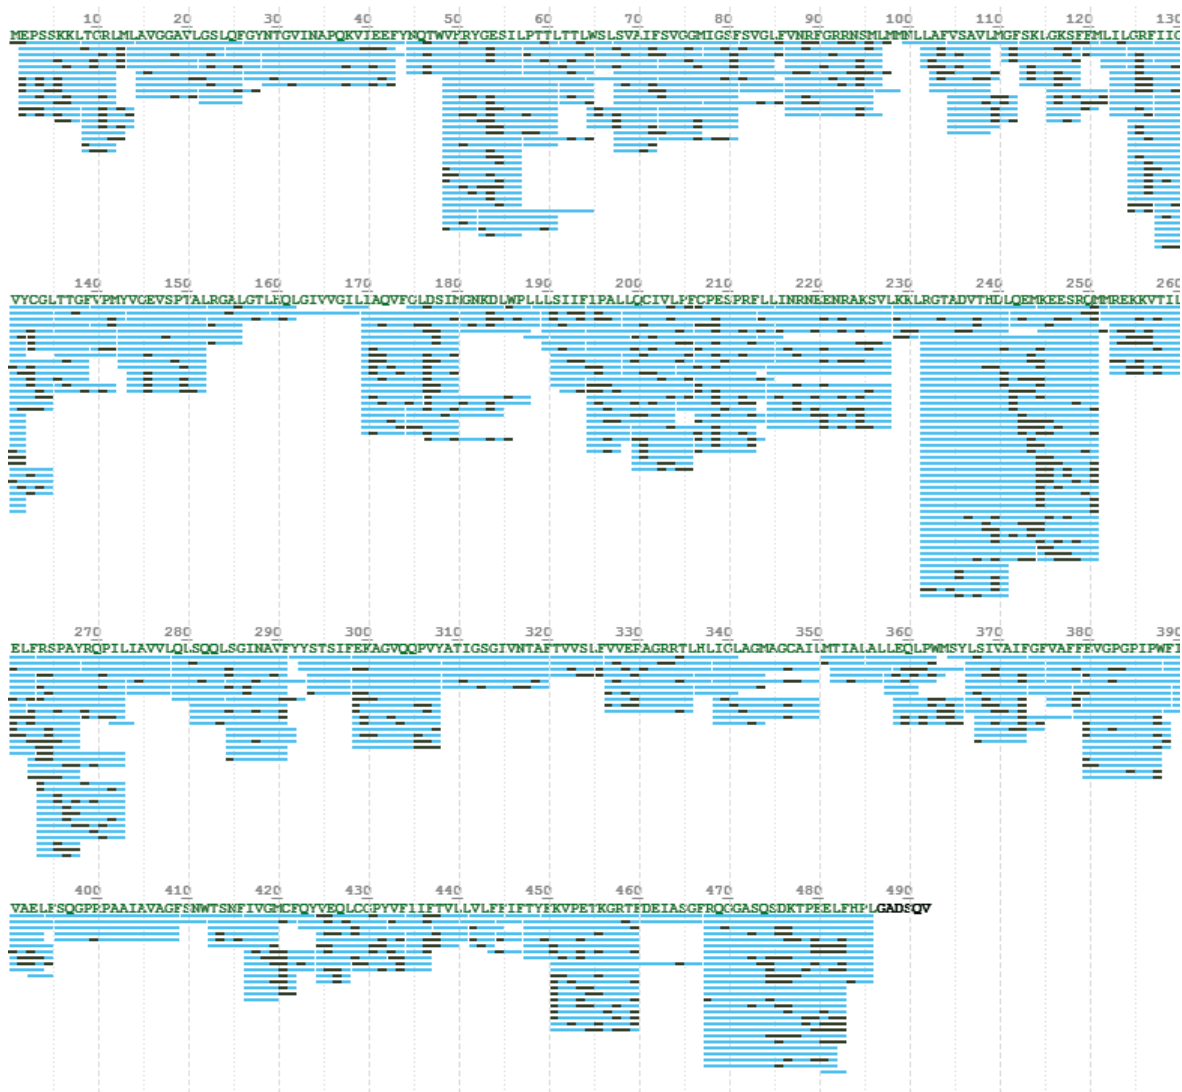

Supplementary Figure 17. MS sequence coverage example of hGLUT1 in bottom-up proteomics obtained by Biologic™ software.

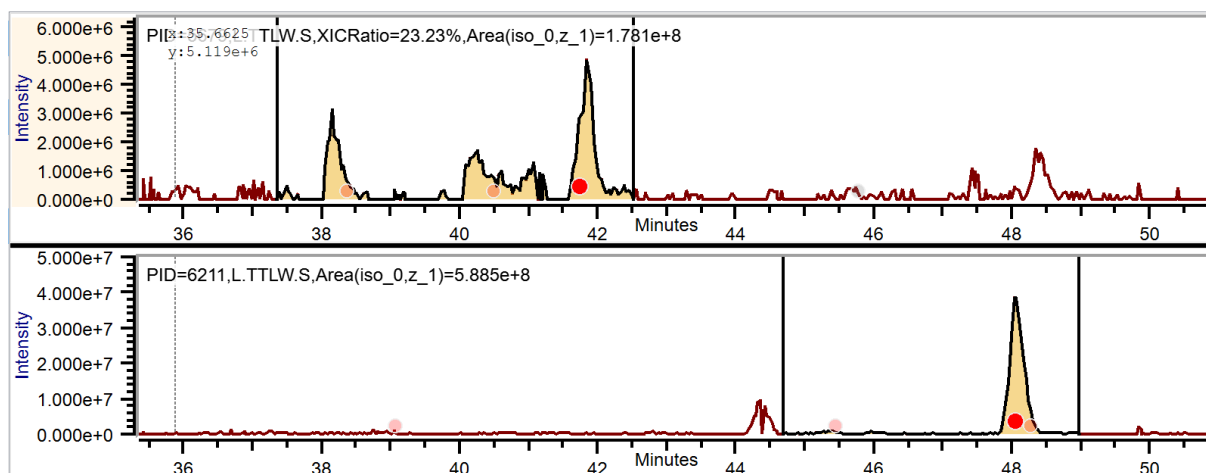

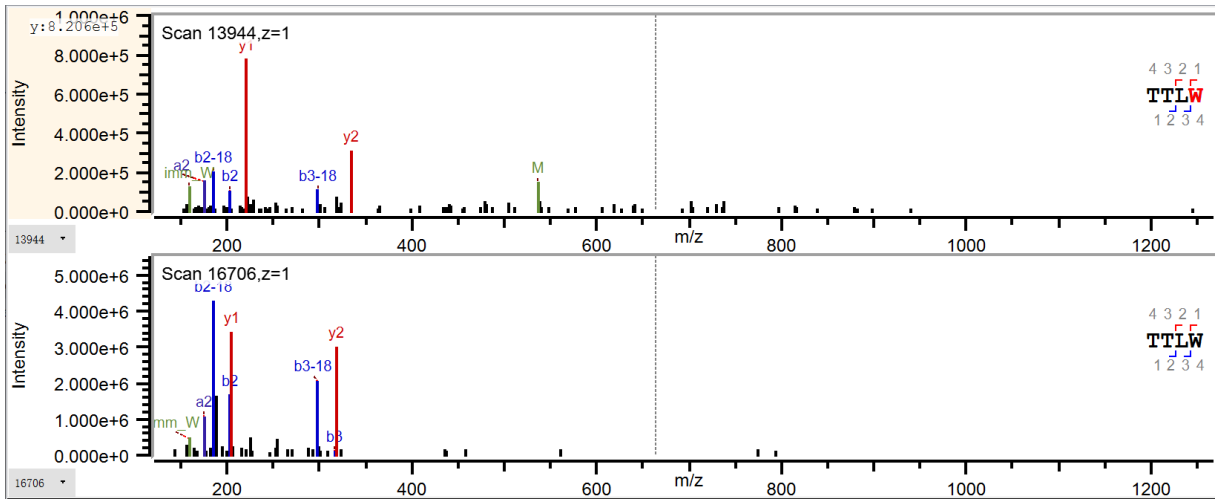

**Supplementary Figure 18.** (A) EIC and product-ion ( $MS^2$ ) spectrum of modified and unmodified peptide 62-65 from hGLUT1.

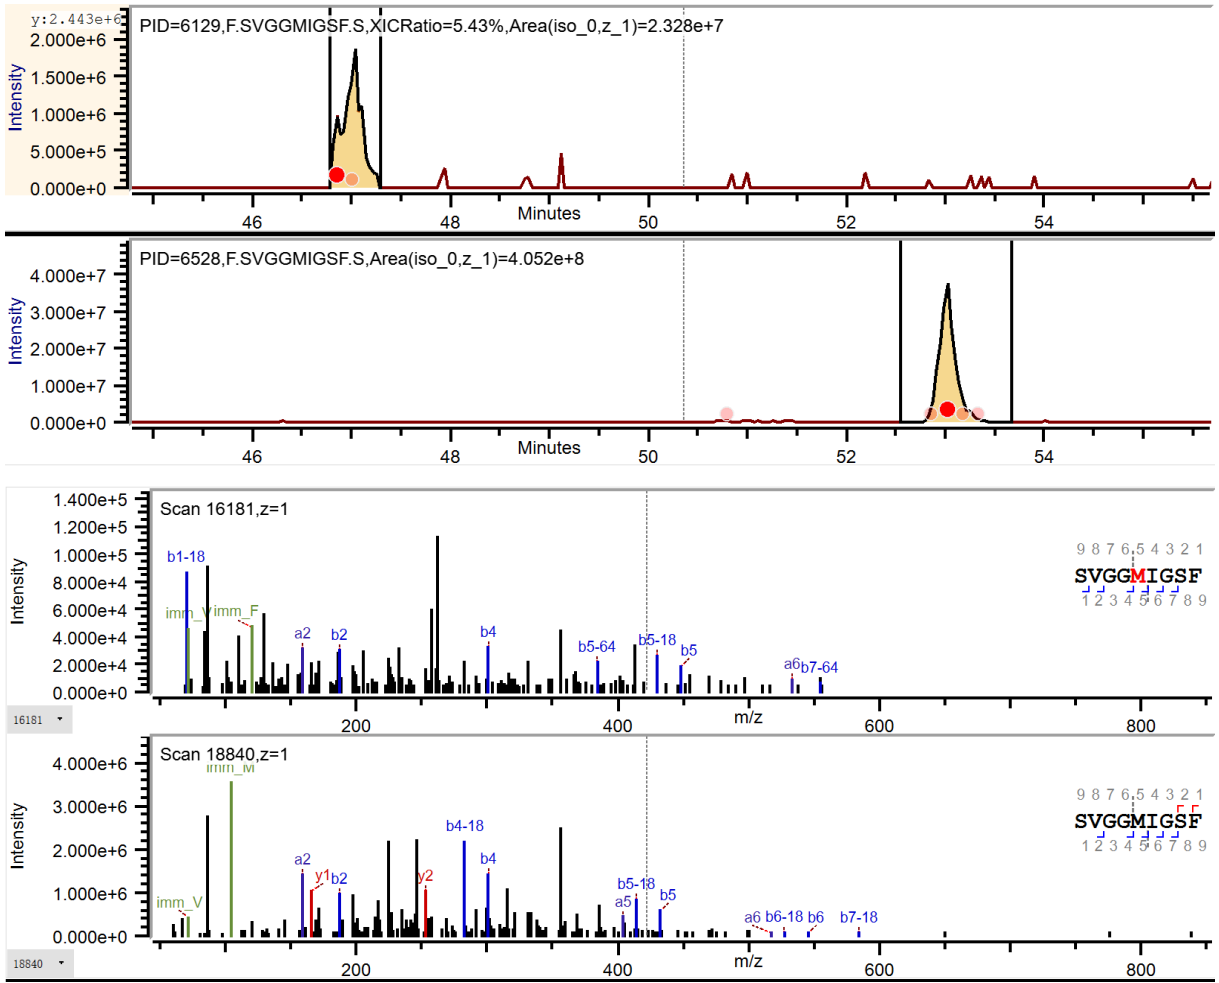

**Supplementary Figure 19.** (A) EIC and product-ion ( $MS^2$ ) spectrum of modified and unmodified peptide 73-81 from hGLUT1.

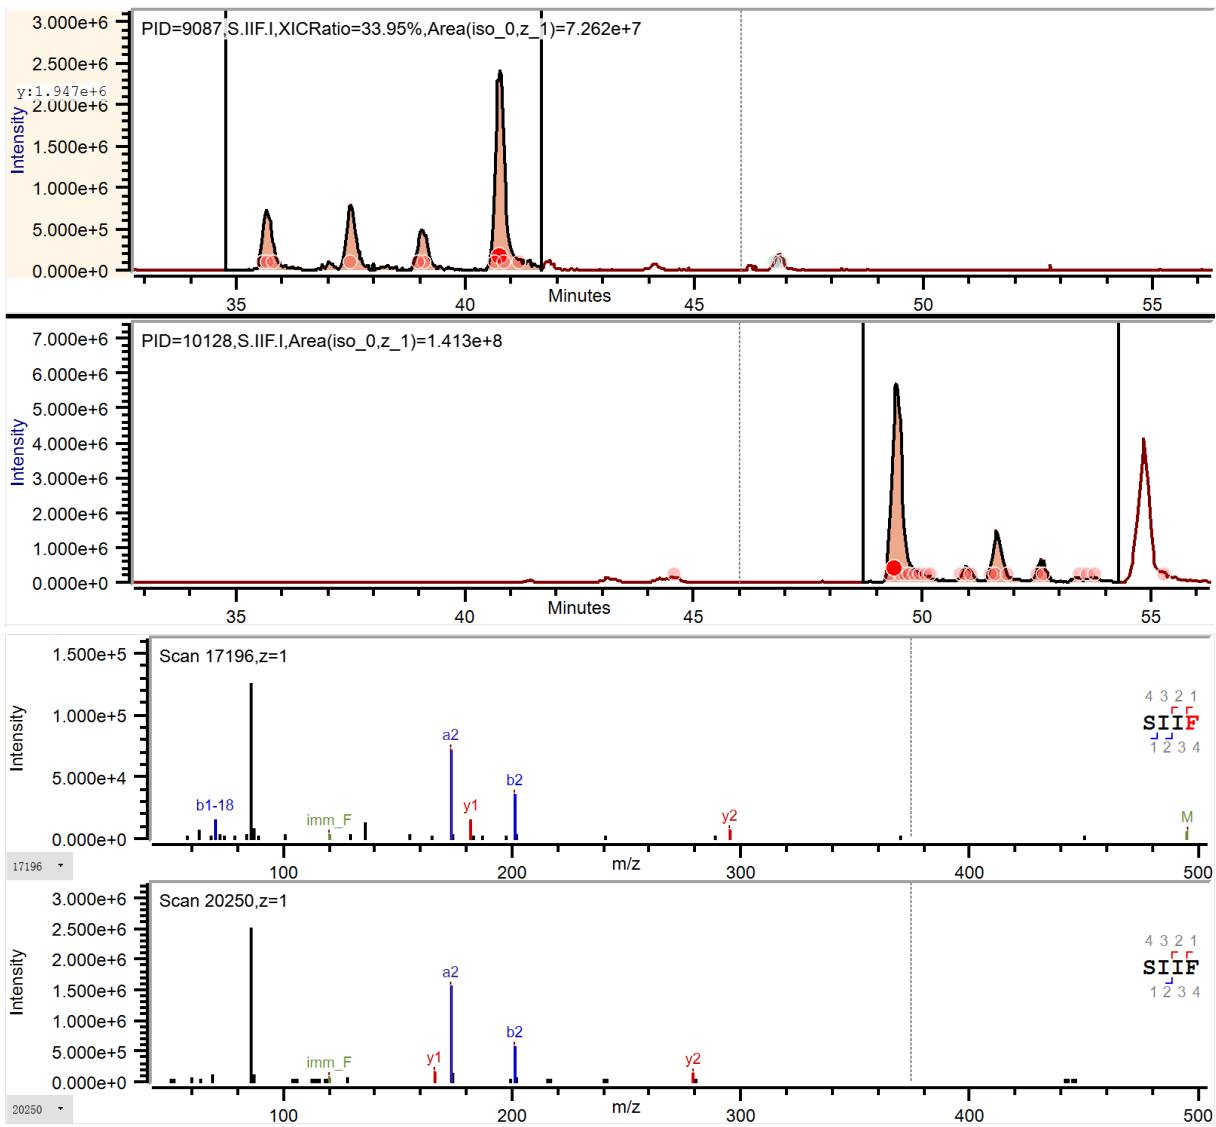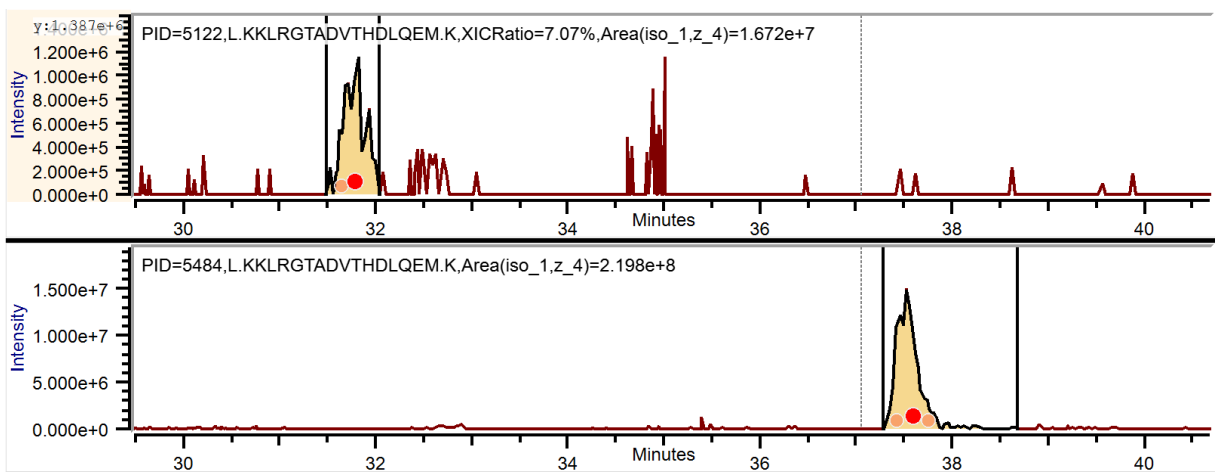

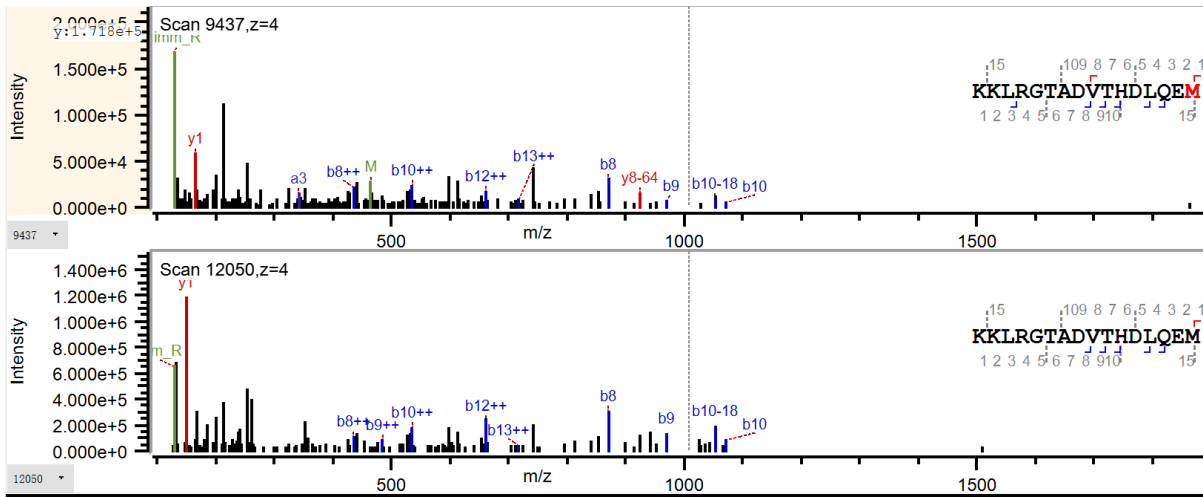

**Supplementary Figure 21.** (A) EIC and product-ion ( $MS^2$ ) spectrum of modified and unmodified peptide 229-244 from hGLUT1.

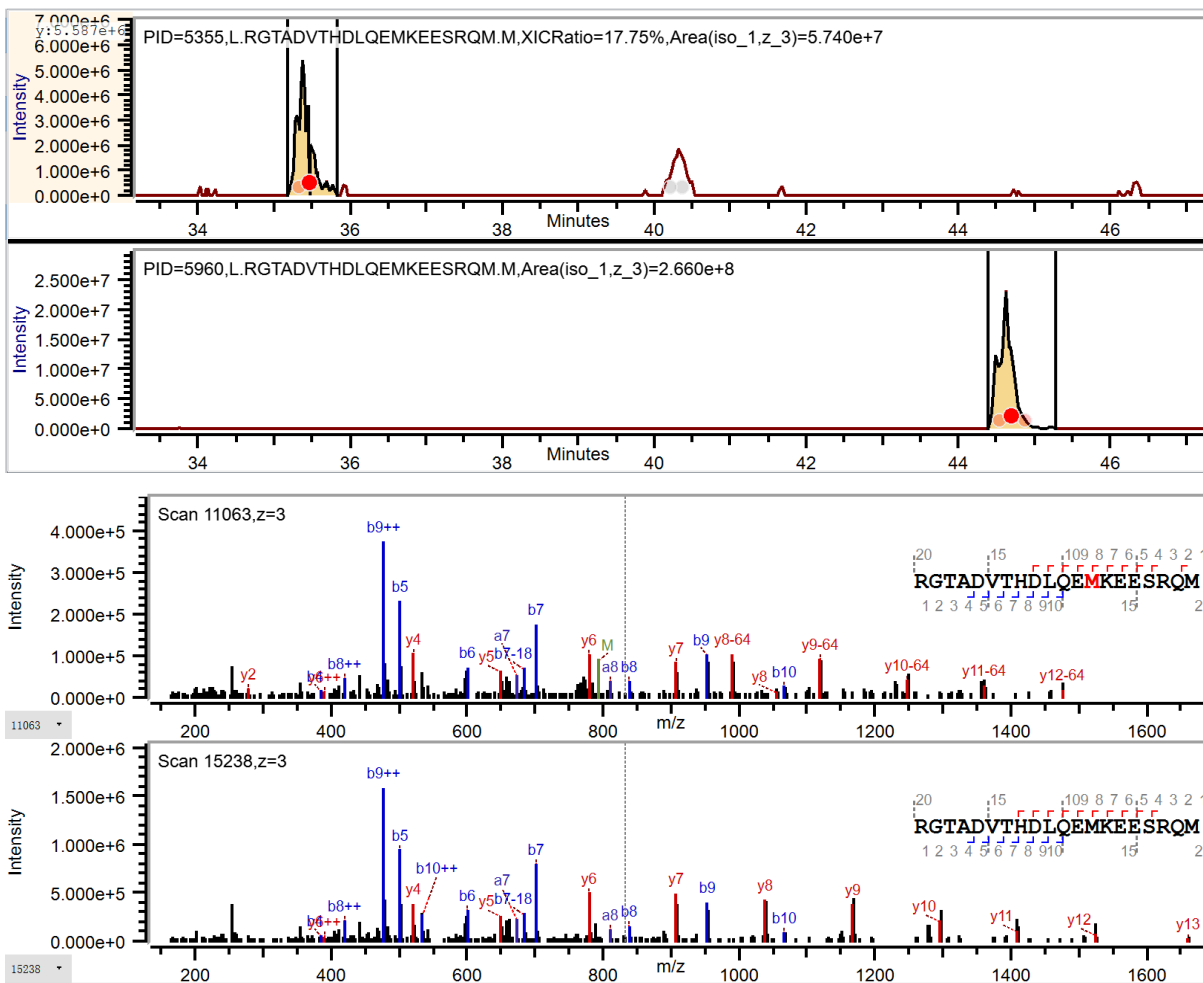

**Supplementary Figure 22.** (A) EIC and product-ion ( $MS^2$ ) spectrum of modified and unmodified peptide 232-251 from hGLUT1.

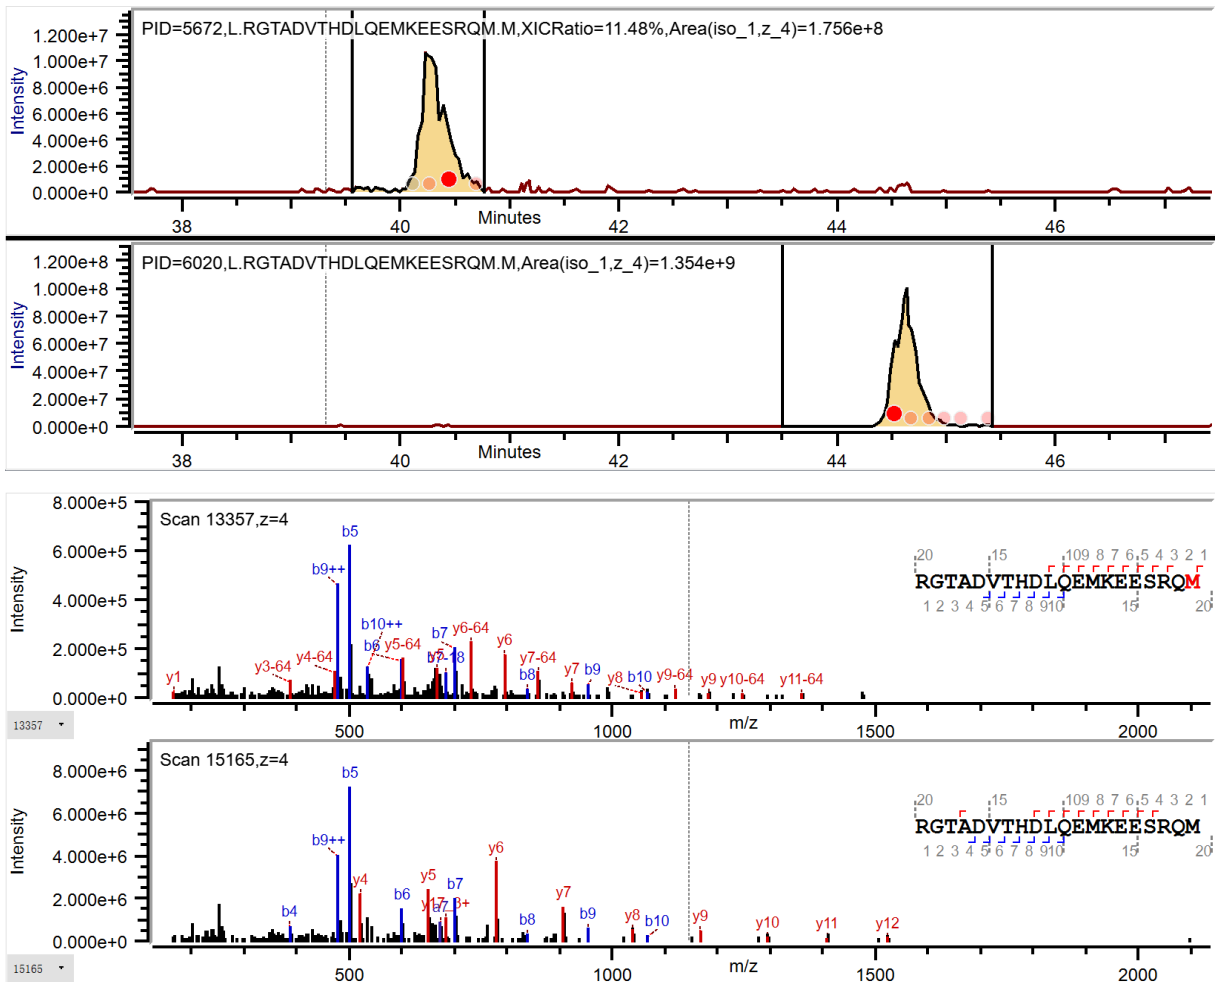

**Supplementary Figure 23. (A)** EIC and product-ion ( $MS^2$ ) spectrum of modified and unmodified peptide 232-251 from hGLUT1.

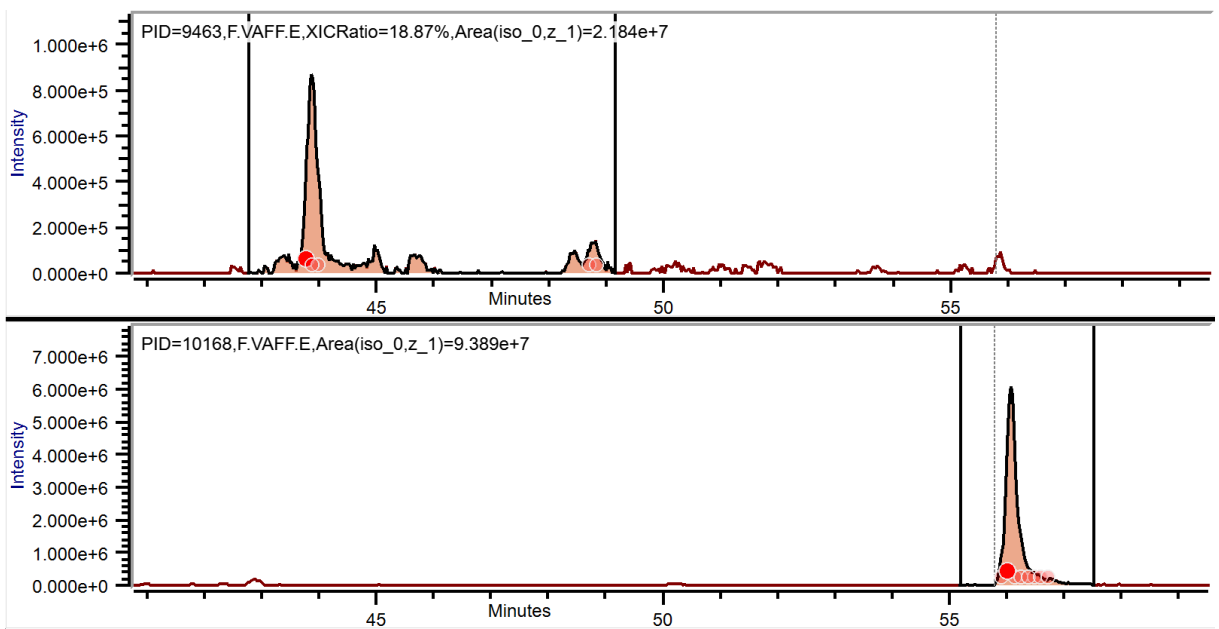



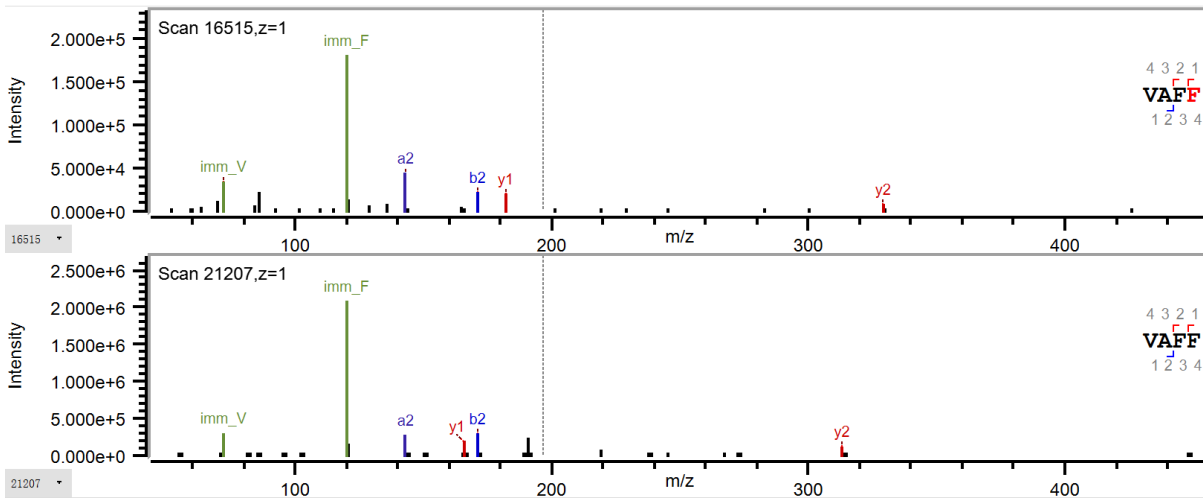

**Supplementary Figure 24.** (A) EIC and product-ion ( $MS^2$ ) spectrum of modified and unmodified peptide 376-379 from hGLUT1.

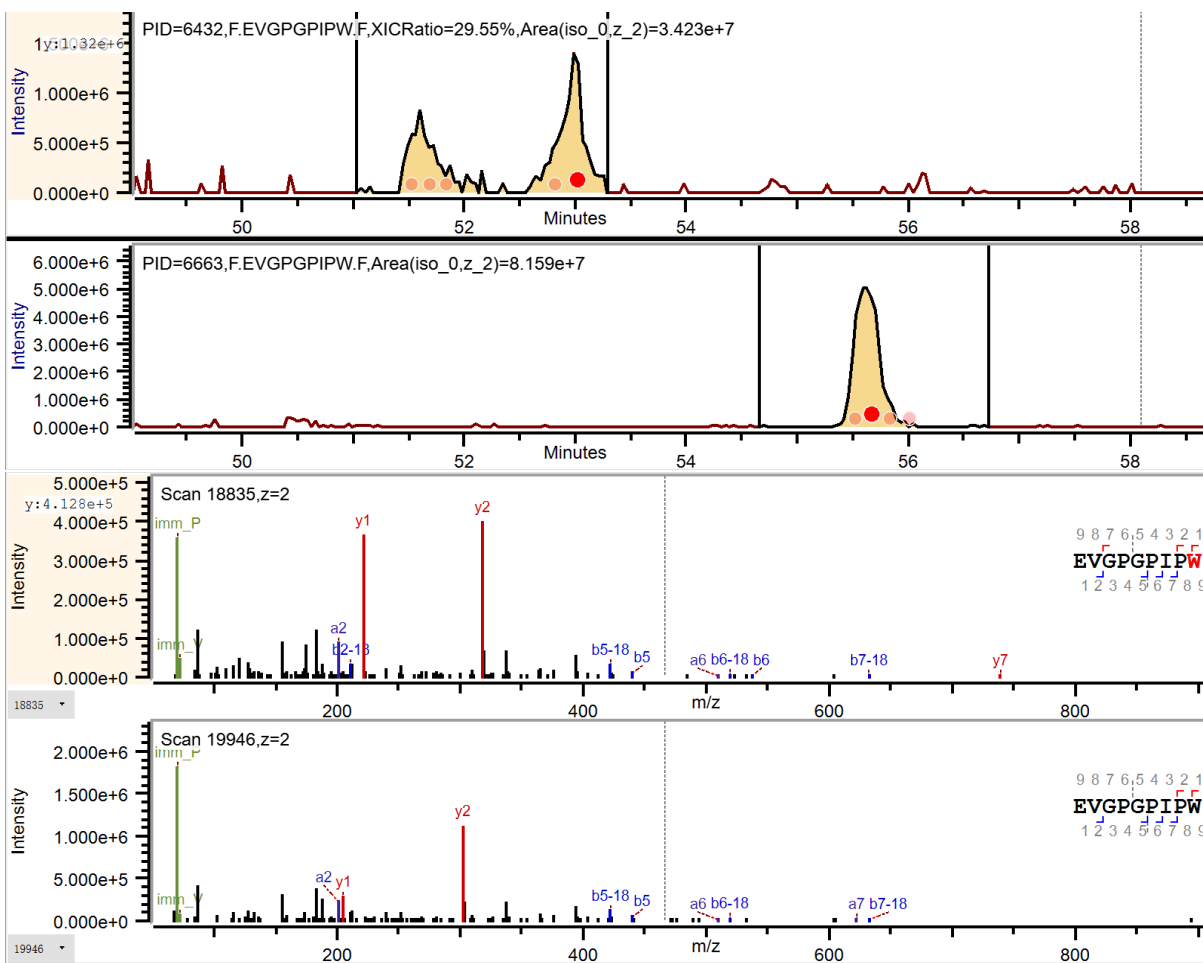

**Supplementary Figure 25.** (A) EIC and product-ion ( $MS^2$ ) spectrum of modified and unmodified peptide 380-388 from hGLUT1.

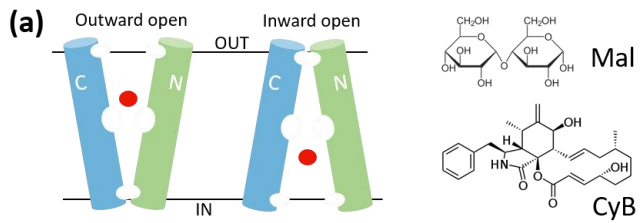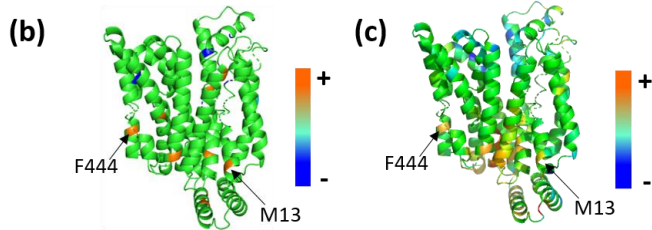

**Supplementary Figure 26.** SASA change upon ligand binding. (a) Cartoon of outward open and inward open models with binding to Mal and CyB, respectively. Red dot represents the binding ligand. (b) NanoPOMP modification extent difference of [CyB bound state – Mal bound model state] shown on hGLUT1 3D structure. Orange represents increased modification extents. (c) Calculated SASA difference: [CyB bound state – Mal bound model state]. Orange represents higher SASA.

## 2. Supplementary Tables

**Supplementary Table 1.** Optimization of several conditions for NanoPOMP. All volumes are in  $\mu\text{L}$ .

|                  | 0%   | 2%   | 4%   | 5%  | 6%   | 8%   | 10%  | 13% | 15% |
|------------------|------|------|------|-----|------|------|------|-----|-----|
| VKOR-liposome    | 2.5  | 2.5  | 2.5  | 2.5 | 2.5  | 2.5  | 2.5  | 2.5 | 2.5 |
| TiO <sub>2</sub> | 5.0  | 5.0  | 5.0  | 5.0 | 5.0  | 5.0  | 5.0  | 5.0 | 5.0 |
| Tris buffer      | 42.5 | 41.5 | 40.5 | 40  | 39.5 | 38.5 | 37.5 | 36  | 35  |
| Acetone          | 0    | 1    | 2    | 2.5 | 3    | 4    | 5    | 6.5 | 7.5 |

**Supplementary Table 2.** NanoPOMP experiments of hGLUT1 in liposome. All volumes are in  $\mu\text{L}$ .

|                  | A   | B   | C           | D       | E       |
|------------------|-----|-----|-------------|---------|---------|
| GLUT1-liposome   | 5.0 | 5.0 | 5.0         | 5.0     | 5.0     |
| TiO <sub>2</sub> | 5.0 | 5.0 | 5.0         | 5.0     | 5.0     |
| Acetone          | 0   | 3   | 3           | 3       | 3       |
| Tris buffer      | 40  | 37  | 32          | 32      | 32      |
| Substrates       | --  | --  | 5 (glucose) | 5 (Mal) | 5 (CyB) |

**Supplementary Table 3.** TiO<sub>2</sub>-FPOP of hGLUT1 at the peptide level.

| Peptide Number | <i>m/z</i> unmod | <i>m/z</i> modified | EIC unmod | EIC modified | Fraction modified | Modified residue |
|----------------|------------------|---------------------|-----------|--------------|-------------------|------------------|
| 62-65          | 520.277          | 536.271             | 1.581E8   | 8.196E7      | 3.414             | W                |
| 73-81          | 854.408          | 870.403             | 1.758E8   | 1.859E7      | 9.559             | M                |
| 140-152        | 681.852          | 689.850             | 2.132E7   | 9.798E6      | 31.49             | M                |
| 140-143        | 509.243          | 525.238             | 6.835E7   | 1.319E8      | 65.86             | M                |
| 144-150        | 344.679          | 322.689             | 4.674E8   | 1.248E7      | 2.601             | E                |
| 191-194        | 479.286          | 495.281             | 6.595E7   | 9.750E6      | 12.88             | F                |
| 232-244        | 491.565          | 496.895             | 8.890E7   | 5.553E7      | 38.45             | M                |
| 232-251        | 788.037          | 793.368             | 1.055E7   | 1.672E7      | 16.31             | M                |
| 299-308        | 559.796          | 537.801             | 1.124E9   | 4.268E6      | 0.378             | D                |
| 380-388        | 476.250          | 484.248             | 6.380E7   | 2.363E7      | 27.02             | W                |

**Supplementary Table 4.** NanoPOMP of hGLUT1 (control group: apo state) on peptide level.

| Peptide Number | <i>m/z</i> unmod | <i>m/z</i> modified | EIC unmod | EIC modified | Fraction modified | Modified residue |
|----------------|------------------|---------------------|-----------|--------------|-------------------|------------------|
| 13-21          | 830.480          | 846.477             | 2.711E6   | 4.731E6      | 63.57             | M                |
| 62-65          | 520.276          | 552.206             | 2.307E8   | 5.139E6      | 1.608             | W                |
| 68-72          | 530.307          | 552.303             | 3.077E7   | 3.867E6      | 12.01             | F                |
| 73-81          | 854.408          | 870.403             | 6.875E6   | 1.298E7      | 62.94             | M                |
| 99-102         | 490.269          | 506.264             | 3.563E7   | 7.835E6      | 18.02             | M                |
| 102-104        | 350.207          | 366.202             | 1.180E8   | 2.449E7      | 17.51             | F                |
| 105-110        | 310.177          | 318.175             | 9.440E6   | 8.756E6      | 48.35             | M                |
| 120-124        | 618.352          | 634.347             | 1.193E7   | 6.513E6      | 35.40             | M                |
| 123-127        | 303.192          | 311.189             | 2.427E8   | 7.431E6      | 2.971             | R                |

|                |         |         |         |         |       |          |
|----------------|---------|---------|---------|---------|-------|----------|
| <b>140-143</b> | 509.243 | 525.238 | 1.793E7 | 1.800E7 | 54.00 | M        |
| <b>170-174</b> | 289.170 | 297.173 | 5.347E6 | 2.304E6 | 12.53 | F        |
| <b>175-180</b> | 635.306 | 651.300 | 4.693E7 | 3.570E6 | 7.069 | M        |
| <b>191-194</b> | 479.286 | 495.281 | 1.165E8 | 1.070E8 | 52.13 | F        |
| <b>195-199</b> | 526.360 | 542.355 | 5.373E7 | 1.715E8 | 23.85 | Not sure |
| <b>229-244</b> | 461.495 | 465.493 | 1.672E7 | 2.198E8 | 7.068 | M        |
| <b>232-244</b> | 491.565 | 496.895 | 9.340E7 | 1.464E7 | 13.54 | M        |
| <b>232-251</b> | 788.037 | 793.368 | 5.74E7  | 2.660E8 | 17.75 | M        |
| <b>252-260</b> | 373.230 | 378.502 | 2.830E7 | 2.710E7 | 48.69 | M        |
| <b>261-263</b> | 408.212 | 424.207 | 4.378E8 | 8.409E7 | 16.36 | F        |
| <b>269-273</b> | 313.703 | 321.700 | 1.245E8 | 2.450E7 | 16.44 | not sure |
| <b>287-291</b> | 563.330 | 579.313 | 1.250E6 | 2.232E6 | 63.11 | F        |
| <b>299-308</b> | 559.796 | 567.791 | 2.571E8 | 6.073E6 | 2.30  | Not sure |
| <b>337-341</b> | 276.679 | 284.676 | 2.644E7 | 3.814E6 | 12.60 | I        |
| <b>376-379</b> | 483.260 | 499.255 | 1.011E8 | 1.636E7 | 13.82 | F        |
| <b>379-388</b> | 549.785 | 557.782 | 7.239E6 | 6.014E6 | 26.14 | W        |
| <b>380-388</b> | 476.254 | 484.251 | 8.159E7 | 3.423E7 | 29.55 | W        |
| <b>389-395</b> | 794.481 | 838.471 | 7.456E5 | 7.474E8 | 0.100 | E        |
| <b>435-437</b> | 392.254 | 408.249 | 2.174E8 | 11.26E7 | 33.95 | F        |
| <b>442-444</b> | 378.239 | 394.234 | 9.617E7 | 3.263E7 | 24.88 | F        |
| <b>445-447</b> | 426.239 | 442.234 | 2.486E7 | 1.323E7 | 34.68 | F        |
| <b>461-467</b> | 694.341 | 738.330 | 1.366E7 | 3.091E9 | 0.440 | D        |

**Supplementary Table 5.** Information of labeled peptide from TiO<sub>2</sub>-isopropanol FPOP of hGLUT1.

| Peptide | Modification Ratio (%) | Location       |
|---------|------------------------|----------------|
| 62-65   | 23.23                  | Extra-membrane |
| 73-81   | 5.433                  | TM2            |
| 191-194 | 52.13                  | TM6            |
| 195-199 | 23.85                  | TM6            |
| 229-244 | 7.068                  | Extra-membrane |
| 232-251 | 5.884                  | Extra-membrane |
| 299-308 | 0.658                  | TM8            |
| 309-320 | 0.551                  | TM8            |
| 376-379 | 55.39                  | TM10           |
| 379-388 | 26.14                  | TM10           |
| 380-388 | 29.55                  | TM10           |
| 389-395 | 0.1                    | Extra-membrane |
| 445-447 | 14.76                  | TM12           |
| 461-467 | 0.44                   | Extra-membrane |
